# Supplementary material
Source: PubMed Central journal article supplement (PMC7190449)
Supplement: NIHMS1550164-supplement-1.pdf [file NIHMS1550164-supplement-1.pdf]

**Supplementary Information Table 1a: Strains used in this study**

| Organism               | Strain | Name used in this study       | Genotype                                                                                                                                | Description                                                                                                                  | Reference/Source              |
|------------------------|--------|-------------------------------|-----------------------------------------------------------------------------------------------------------------------------------------|------------------------------------------------------------------------------------------------------------------------------|-------------------------------|
| <i>Vibrio cholerae</i> | V52    |                               |                                                                                                                                         | Parental V52 strain. Constitutively active T6SS. Serotype O37. Used as <i>V. cholerae</i> strain unless otherwise indicated. |                               |
|                        |        | Wild-type                     | $\Delta hlyA \Delta hapA \Delta rtxA$                                                                                                   |                                                                                                                              | Pukatzki <i>et al.</i> (2006) |
|                        |        | $\Delta T6SS$                 | $\Delta vsk (tssM)$                                                                                                                     | Deletion of VCA0120, T6SS-negative mutant                                                                                    | Pukatzki <i>et al.</i> (2006) |
|                        |        | $\Delta tsiV1\&2$             | $\Delta tsiV1 \Delta tsiV2$                                                                                                             | Deletion of VC1417-VC1421 and VCA0019-VCA0021 (including immunity genes for both TseL and VasX)                              | This work                     |
|                        |        | $\Delta tsiV3$                | $\Delta tsiV3$                                                                                                                          | Deletion of VCA0123-VCA0124 (including immunity gene for VgrG3)                                                              | Dong <i>et al.</i> (2013)     |
|                        |        | $\Delta tsiV1\&2 \Delta vpsA$ | $\Delta tsiV1 \Delta tsiV2 \Delta vpsA$                                                                                                 | Deletion of vpsA (VC0917) in $\Delta tsiV1\&2$ background                                                                    | This work                     |
|                        |        | $\Delta tsiV3 \Delta vpsA$    | $\Delta tsiV3 \Delta vpsA$                                                                                                              | Deletion of vpsA (VC0917) in $\Delta tsiV3$ background                                                                       | This work                     |
|                        |        | TseH <sup>WT</sup>            | VipA(tssB)-mcherry, TseL <sup>D425A</sup> , VgrG3 <sup>D842A</sup> , VasX <sup><math>\Delta 852-867</math></sup>                        | Catalytic mutations in all anti-bacterial effectors except TseH                                                              | Liang <i>et al.</i> (2019)    |
|                        |        | TseH <sup>H64A</sup>          | VipA(tssB)-mcherry, TseL <sup>D425A</sup> , VgrG3 <sup>D842A</sup> , VasX <sup><math>\Delta 852-867</math></sup> , TseH <sup>H64A</sup> | Catalytic mutations in all anti-bacterial effectors including TseH                                                           | This work                     |
|                        |        | $\Delta PAAR2$                | VasX <sup><math>\Delta 852-867</math></sup> , $\Delta PAAR2$                                                                            | Deletion of VCA0284 in TseH <sup>WT</sup> background                                                                         | This work                     |
|                        |        | $\Delta tsiH$                 | $\Delta tseH \Delta tsiH$                                                                                                               | Deletion of VCA0285 and VCA0286                                                                                              | Altindis <i>et al.</i> (2015) |
|                        |        | $\Delta wigR$                 | $\Delta wigR (vxrB)$                                                                                                                    | Deletion of VCA0566                                                                                                          | This work                     |
|                        |        | $\Delta tsiH \Delta wigR$     | $\Delta tsiH \Delta wigR$                                                                                                               | Deletion of VCA0566 in $\Delta tsiH$ background                                                                              | This work                     |
|                        |        | $\Delta imm$                  | $\Delta tsiV1 \Delta tsiV2 \Delta tsiV3$                                                                                                | Deletion of VC1417-VC1421, VCA0019-VCA0021, and VCA0123-VCA0124 (including immunity genes for TseL, VasX, and VgrG3)         | This work                     |

|                             |           |                                            |                                                           |                                                                                                                                                               |                            |
|-----------------------------|-----------|--------------------------------------------|-----------------------------------------------------------|---------------------------------------------------------------------------------------------------------------------------------------------------------------|----------------------------|
|                             |           | $\Delta imm \Delta wigR$                   | $\Delta tsiV1 \Delta tsiV2 \Delta tsiV3$<br>$\Delta wigR$ | Deletion of VCA0566 in $\Delta imm$ background                                                                                                                | This work                  |
|                             |           | $\Delta T6SS \Delta vpsA$                  | $\Delta vasK \Delta vpsA$                                 | Deletion of <i>vpsA</i> (VC0917) in $\Delta T6SS$ background                                                                                                  | This work                  |
|                             |           | $\Delta T6SS \Delta wigR$                  | $\Delta vasK \Delta wigR$                                 | Deletion of VCA0566 in $\Delta T6SS$ background                                                                                                               | This work                  |
|                             |           | $\Delta T6SS \Delta wigR$<br>$\Delta vpsA$ | $\Delta vasK \Delta wigR \Delta vpsA$                     | Deletion of <i>vpsA</i> (VC0917) in $\Delta T6SS \Delta wigR$ background                                                                                      | This work                  |
|                             | C6706     | C6706                                      |                                                           | Serotype O1 <i>El Tor</i> pandemic strain C6706. T6SS is silent under standard laboratory conditions.                                                         | Lab of Dr. John Mekalanos  |
| <i>Aeromonas dhakensis</i>  | SSU       | <i>A. dhakensis</i>                        |                                                           | T6SS-positive <i>A. dhakensis</i> strain SSU. T6SS-negative mutant of <i>A. dhakensis</i> SSU. Used as <i>A. dhakensis</i> prey strain throughout this study. | Liang <i>et al.</i> (2015) |
|                             |           |                                            | $\Delta vasK (tssM)$                                      |                                                                                                                                                               | Liang <i>et al.</i> (2015) |
| <i>Aeromonas hydrophila</i> | AH-1      | AH-1                                       |                                                           | <i>A. hydrophila</i> isolate                                                                                                                                  | Lab of Dr. John Mekalanos  |
|                             | AH-3      | AH-3                                       |                                                           | <i>A. hydrophila</i> isolate                                                                                                                                  | Lab of Dr. John Mekalanos  |
|                             | LL1       | LL1                                        |                                                           | <i>A. hydrophila</i> isolate                                                                                                                                  | Lab of Dr. John Mekalanos  |
|                             | Aer-184   | Aer-184                                    |                                                           | <i>A. hydrophila</i> isolate                                                                                                                                  | Lab of Dr. John Mekalanos  |
|                             | Aer-205   | Aer-205                                    |                                                           | <i>A. hydrophila</i> isolate                                                                                                                                  | Lab of Dr. John Mekalanos  |
|                             | Aer-19    | Aer-19                                     |                                                           | <i>A. hydrophila</i> isolate                                                                                                                                  | Lab of Dr. John Mekalanos  |
|                             | L31       | L31                                        |                                                           | <i>A. hydrophila</i> isolate                                                                                                                                  | Lab of Dr. John Mekalanos  |
| <i>Edwardsiella sp.</i>     | PPD130/91 | PPD130/91                                  |                                                           | <i>E. piscicida</i> isolate                                                                                                                                   | Lab of Dr. John Mekalanos  |
|                             | AL9739    | AL9739                                     |                                                           | <i>Edwardsiella sp.</i> isolate                                                                                                                               | Lab of Dr. John Mekalanos  |

|                                |                               |                      |                                       |                                                                                                                |                            |
|--------------------------------|-------------------------------|----------------------|---------------------------------------|----------------------------------------------------------------------------------------------------------------|----------------------------|
|                                | E381                          | E381                 |                                       | <i>E. piscicida</i> isolate                                                                                    | Lab of Dr. John Mekalanos  |
|                                | NUF251                        | NUF251               |                                       | <i>E. piscicida</i> isolate                                                                                    | Lab of Dr. John Mekalanos  |
|                                | SU226                         | SU226                |                                       | <i>Edwardsiella sp.</i> isolate                                                                                | Lab of Dr. John Mekalanos  |
| <i>Acinetobacter baylyi</i>    | ADP1                          | ADP1                 | $\Delta$ T6SS                         | <i>Deletion of large T6SS cluster in A. baylyi</i> isolate ADP1                                                | Lab stock                  |
| <i>Vibrio parahaemolyticus</i> | RIMD2210633                   | RIMD2210633          |                                       | <i>V. parahaemolyticus</i> isolate                                                                             | Lab of Dr. Jun Zheng       |
| <i>Escherichia coli</i>        | MG1655                        | MG1655               |                                       | K-12 wild-type strain                                                                                          | Lab of Dr. Herb Schellhorn |
|                                | DH5 $\alpha$ -T1 <sup>R</sup> | DH5 $\alpha$         |                                       | Cloning strain                                                                                                 | ThermoFisher Scientific    |
|                                | BL21 (DE3)                    | BL21                 |                                       | T7 expression strain                                                                                           | New England Biolabs        |
|                                | BW25113                       |                      |                                       | Keio collection parental strain derived from MG1655. Used as <i>E. coli</i> strain unless otherwise indicated. | Baba <i>et al.</i> (2006)  |
|                                |                               | Wild-type            |                                       |                                                                                                                |                            |
|                                |                               | $\Delta$ <i>rcsB</i> | $\Delta$ <i>rcsB::kan<sup>R</sup></i> | Keio collection strain JW2205                                                                                  | Baba <i>et al.</i> (2006)  |
|                                |                               | $\Delta$ <i>baeR</i> | $\Delta$ <i>baeR::kanR</i>            | Keio collection strain JW2064                                                                                  | Baba <i>et al.</i> (2006)  |
|                                |                               | $\Delta$ <i>cpxR</i> | $\Delta$ <i>cpxR::kanR</i>            | Keio collection strain JW3883                                                                                  | Baba <i>et al.</i> (2006)  |
|                                |                               | $\Delta$ <i>pspF</i> | $\Delta$ <i>pspF::kanR</i>            | Keio collection strain JW1296                                                                                  | Baba <i>et al.</i> (2006)  |
|                                |                               | $\Delta$ <i>rpoS</i> | $\Delta$ <i>rpoS::kanR</i>            | Keio collection strain JW5437                                                                                  | Baba <i>et al.</i> (2006)  |
|                                |                               | $\Delta$ <i>soxR</i> | $\Delta$ <i>soxR::kanR</i>            | Keio collection strain JW4024                                                                                  | Baba <i>et al.</i> (2006)  |
|                                |                               | $\Delta$ <i>degP</i> | $\Delta$ <i>degP::kanR</i>            | Keio collection strain JW0157                                                                                  | Baba <i>et al.</i> (2006)  |
|                                |                               | $\Delta$ <i>osmB</i> | $\Delta$ <i>osmB::kanR</i>            | Keio collection strain JW1275                                                                                  | Baba <i>et al.</i> (2006)  |
|                                |                               | $\Delta$ <i>wza</i>  | $\Delta$ <i>wza::kanR</i>             | Keio collection strain JW2047                                                                                  | Baba <i>et al.</i> (2006)  |
|                                |                               | $\Delta$ <i>bdm</i>  | $\Delta$ <i>bdm::kanR</i>             | Keio collection strain JW5239                                                                                  | Baba <i>et al.</i> (2006)  |
|                                |                               | $\Delta$ <i>mdtC</i> | $\Delta$ <i>mdtC::kanR</i>            | Keio collection strain JW2061                                                                                  | Baba <i>et al.</i> (2006)  |
|                                |                               | $\Delta$ <i>spy</i>  | $\Delta$ <i>spy::kanR</i>             | Keio collection strain JW1732                                                                                  | Baba <i>et al.</i> (2006)  |
|                                |                               | $\Delta$ <i>tolB</i> | $\Delta$ <i>tolB::kanR</i>            | Keio collection strain JW5100                                                                                  | Baba <i>et al.</i> (2006)  |
|                                |                               | $\Delta$ <i>ddlB</i> | $\Delta$ <i>ddlB::kanR</i>            | Keio collection strain JW0090                                                                                  | Baba <i>et al.</i> (2006)  |
|                                |                               | $\Delta$ <i>degQ</i> | $\Delta$ <i>degQ::kanR</i>            | Keio collection strain JW3203                                                                                  | Baba <i>et al.</i> (2006)  |

|               |                     |                               |                           |
|---------------|---------------------|-------------------------------|---------------------------|
| $\Delta rseA$ | $\Delta rseA::kanR$ | Keio collection strain JW2556 | Baba <i>et al.</i> (2006) |
| $\Delta bepA$ | $\Delta bepA::kanR$ | Keio collection strain JW2479 | Baba <i>et al.</i> (2006) |
| $\Delta ycaL$ | $\Delta ycaL::kanR$ | Keio collection strain JW0892 | Baba <i>et al.</i> (2006) |
| $\Delta mrcA$ | $\Delta mrcA::kanR$ | Keio collection strain JW3359 | Baba <i>et al.</i> (2006) |
| $\Delta pagP$ | $\Delta pagP::kanR$ | Keio collection strain JW0617 | Baba <i>et al.</i> (2006) |
| $\Delta surA$ | $\Delta surA::kanR$ | Keio collection strain JW0052 | Baba <i>et al.</i> (2006) |
| $\Delta rcsF$ | $\Delta rcsF::kanR$ | Keio collection strain JW0192 | Baba <i>et al.</i> (2006) |
| $\Delta rcsC$ | $\Delta rcsC::kanR$ | Keio collection strain JW5917 | Baba <i>et al.</i> (2006) |
| $\Delta wcaA$ | $\Delta wcaA::kanR$ | Keio collection strain JW2044 | Baba <i>et al.</i> (2006) |
| $\Delta wcaJ$ | $\Delta wcaJ::kanR$ | Keio collection strain JW2032 | Baba <i>et al.</i> (2006) |
| $\Delta mliC$ | $\Delta mliC::kanR$ | Keio collection strain JW1631 | Baba <i>et al.</i> (2006) |
| $\Delta osmY$ | $\Delta osmY::kanR$ | Keio collection strain JW4338 | Baba <i>et al.</i> (2006) |
| $\Delta osmC$ | $\Delta osmC::kanR$ | Keio collection strain JW1477 | Baba <i>et al.</i> (2006) |
| $\Delta ivy$  | $\Delta ivy::kanR$  | Keio collection strain JW0210 | Baba <i>et al.</i> (2006) |
| $\Delta ymgD$ | $\Delta ymgD::kanR$ | Keio collection strain JW5177 | Baba <i>et al.</i> (2006) |
| $\Delta ybgS$ | $\Delta ybgS::kanR$ | Keio collection strain JW0736 | Baba <i>et al.</i> (2006) |
| $\Delta mdtA$ | $\Delta mdtA::kanR$ | Keio collection strain JW5338 | Baba <i>et al.</i> (2006) |
| $\Delta tolC$ | $\Delta tolC::kanR$ | Keio collection strain JW5503 | Baba <i>et al.</i> (2006) |
| $\Delta gadE$ | $\Delta gadE::kanR$ | Keio collection strain JW3480 | Baba <i>et al.</i> (2006) |
| $\Delta gadA$ | $\Delta gadA::kanR$ | Keio collection strain JW3485 | Baba <i>et al.</i> (2006) |
| $\Delta gadB$ | $\Delta gadB::kanR$ | Keio collection strain JW1488 | Baba <i>et al.</i> (2006) |
| $\Delta gadC$ | $\Delta gadC::kanR$ | Keio collection strain JW1487 | Baba <i>et al.</i> (2006) |
| $\Delta argH$ | $\Delta argH::kanR$ | Keio collection strain JW3932 | Baba <i>et al.</i> (2006) |
| $\Delta lysA$ | $\Delta lysA::kanR$ | Keio collection strain JW2806 | Baba <i>et al.</i> (2006) |
| $\Delta leuB$ | $\Delta leuB::kanR$ | Keio collection strain JW5807 | Baba <i>et al.</i> (2006) |
| $\Delta bglJ$ | $\Delta bglJ::kanR$ | Keio collection strain JW5955 | Baba <i>et al.</i> (2006) |
| $\Delta pspA$ | $\Delta pspA::kanR$ | Keio collection strain JW1297 | Baba <i>et al.</i> (2006) |
| $\Delta soxS$ | $\Delta soxS::kanR$ | Keio collection strain JW4023 | Baba <i>et al.</i> (2006) |

| <b>Supplementary Information Table 1b: Plasmids used in this study</b> |                      |                                                                                                                                                                  |                               |
|------------------------------------------------------------------------|----------------------|------------------------------------------------------------------------------------------------------------------------------------------------------------------|-------------------------------|
| <b>Vector</b>                                                          | <b>Insert</b>        | <b>Description</b>                                                                                                                                               | <b>Reference/Source</b>       |
| pDS132                                                                 |                      | Suicidal conjugation vector for generating in-frame knockouts in <i>V. cholerae</i> .<br><i>Chloramphenicol resistant</i> .                                      | Philippe <i>et al.</i> (2004) |
|                                                                        | PAAR2                | For generating knockout of VCA0284                                                                                                                               | This work                     |
|                                                                        | WigR                 | For generating knockout of VCA0566                                                                                                                               | This work                     |
| pBAD33                                                                 |                      | Arabinose-inducible expression plasmid. Chloramphenicol resistant.                                                                                               | Guzman <i>et al.</i> (1995)   |
|                                                                        | TsiH (VCA0286)       | Expression of immunity gene to protect against TseH                                                                                                              | Altindis <i>et al.</i> (2005) |
|                                                                        | TAT-TseH             | TseH overexpression plasmid including TAT (Twin Arginine Translocation)-tag for periplasm translocation.                                                         | Altindis <i>et al.</i> (2005) |
| pPSV37                                                                 | TAT-VgrG3            | VgrG3 overexpression plasmid including TAT (Twin Arginine Translocation)-tag for periplasm translocation.                                                        | This work                     |
|                                                                        | TAT-TseL             | TseL overexpression plasmid including TAT (Twin Arginine Translocation)-tag for periplasm translocation.                                                         | This work                     |
| pBAD33k                                                                |                      | Kanamycin resistant variant of pBAD33. Used in T6SS competition assay for resistance marker to select for prey.                                                  | This work                     |
|                                                                        | TseH (VCA0285)       | Exogenous TseH expression for complementation                                                                                                                    | This work                     |
|                                                                        | WigR (VCA0566)       | Exogenous WigR expression for complementation                                                                                                                    | This work                     |
|                                                                        | TAT-TseH             | TseH overexpression plasmid including TAT (Twin Arginine Translocation)-tag for periplasm translocation. (As in pBAD33 but with different antibiotic resistance) | This work                     |
| pCA24N                                                                 |                      | ASKA collection plasmid. Includes N-terminal 6His tag. Chloramphenicol resistant.                                                                                | Kitagawa <i>et al.</i> (2005) |
|                                                                        | RcsA                 | Exogenous RcsA for overexpression to induce colanic acid synthesis                                                                                               | Kitagawa <i>et al.</i> (2005) |
|                                                                        | RcsB                 | Exogenous RcsB expression for complementation                                                                                                                    | Kitagawa <i>et al.</i> (2005) |
|                                                                        | BaeR                 | Exogenous BaeR expression for complementation                                                                                                                    | Kitagawa <i>et al.</i> (2005) |
|                                                                        | Spy                  | Exogenous Spy expression for complementation                                                                                                                     | Kitagawa <i>et al.</i> (2005) |
|                                                                        | pSpy <sup>ΔSec</sup> | pCA24N-Spy with Sec secretion tag (first 22 codons of <i>spy</i> ORF) and N-terminal 6His tag deleted                                                            | This work                     |
|                                                                        | DegP                 | Exogenous DegP for overexpression                                                                                                                                | Kitagawa <i>et al.</i> (2005) |
|                                                                        | YeeN                 | Exogenous YeeN for overexpression                                                                                                                                | Kitagawa <i>et al.</i> (2005) |
|                                                                        | PhoB                 | Exogenous PhoB for overexpression                                                                                                                                | Kitagawa <i>et al.</i> (2005) |
|                                                                        | YnjA                 | Exogenous YnjA for overexpression                                                                                                                                | Kitagawa <i>et al.</i> (2005) |
|                                                                        | YiaD                 | Exogenous YiaD for overexpression                                                                                                                                | Kitagawa <i>et al.</i> (2005) |

|          |      |                                              |                               |
|----------|------|----------------------------------------------|-------------------------------|
|          | CreD | Exogenous CreD for overexpression            | Kitagawa <i>et al.</i> (2005) |
|          | MdtC | Exogenous MdtC for overexpression            | Kitagawa <i>et al.</i> (2005) |
|          | ToIC | Exogenous ToIC for overexpression            | Kitagawa <i>et al.</i> (2005) |
| pET-SUMO | TseH | For purification of TseH for crystallography | Altindis <i>et al.</i> (2005) |

- 1 Pukatzki, S. *et al.* Identification of a conserved bacterial protein secretion system in *Vibrio cholerae* using the *Dictyostelium* host model system. *Proc. Natl. Acad. Sci. U. S. A.* **103**, 1528–1533 (2006).
- 2 Dong, T. G., Ho, B. T., Yoder-Himes, D. R. & Mekalanos, J. J. Identification of T6SS-dependent effector and immunity proteins by Tn-seq in *Vibrio cholerae*. *Proc. Natl. Acad. Sci. U. S. A.* **110**, 2623–2628 (2013).
- 3 Liang, X. *et al.* An onboard checking mechanism ensures effector delivery of the type VI secretion system in *Vibrio cholerae*. *Proc. Natl. Acad. Sci.* **116**, 23292 (2019).
- 4 Altindis, E., Dong, T., Catalano, C. & Mekalanos, J. Secretome analysis of *Vibrio cholerae* type VI secretion system reveals a new effector-immunity pair. *MBio* **6**, e00075–e00075 (2015).
- 5 Liang, X. *et al.* Identification of divergent type VI secretion effectors using a conserved chaperone domain. *Proc. Natl. Acad. Sci.* **112**, 9106–9111 (2015).
- 6 Baba, T. *et al.* Construction of *Escherichia coli* K-12 in-frame, single-gene knockout mutants: the Keio collection. *Mol Syst Biol* **2**, (2006).
- 7 Philippe, N., Alcaraz, J. P., Coursange, E., Geiselmann, J. & Schneider, D. Improvement of pCVD442, a suicide plasmid for gene allele exchange in bacteria. *Plasmid* **51**, 246–255 (2004).
- 8 Guzman, L. M., Belin, D., Carson, M. J. & Beckwith, J. Tight regulation, modulation, and high-level expression by vectors containing the arabinose PBAD promoter. *J. Bacteriol.* **177**, 4121–4130 (1995).
- 9 Kitagawa, M. *et al.* Complete set of ORF clones of *Escherichia coli* ASKA library ( A Complete Set of *E. coli* K -12 ORF Archive): Unique Resources for Biological Research. *DNA Res.* **12**, 291–299 (2005).
